# Supplementary material for: PRMT1-mediated H4R3me2a recruits SMARCA4 to promote colorectal cancer progression by enhancing EGFR signaling
Source: PubMed Central journal article supplement (PMC8048298; doi:10.1186/s13073-021-00871-5), 2021-04-14

**Additional file 3:** Scans of the uncropped blots for Western blots.

**Fig. S1.** Uncropped blots for Western blots in Fig.1.

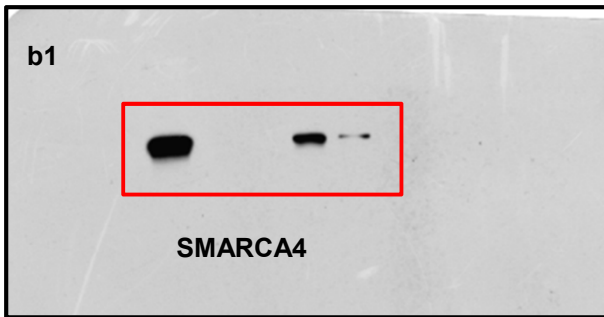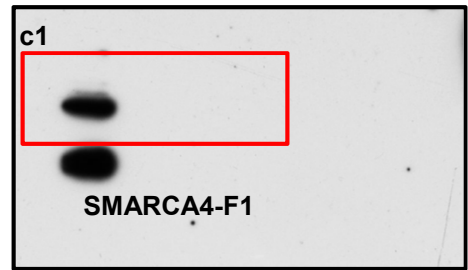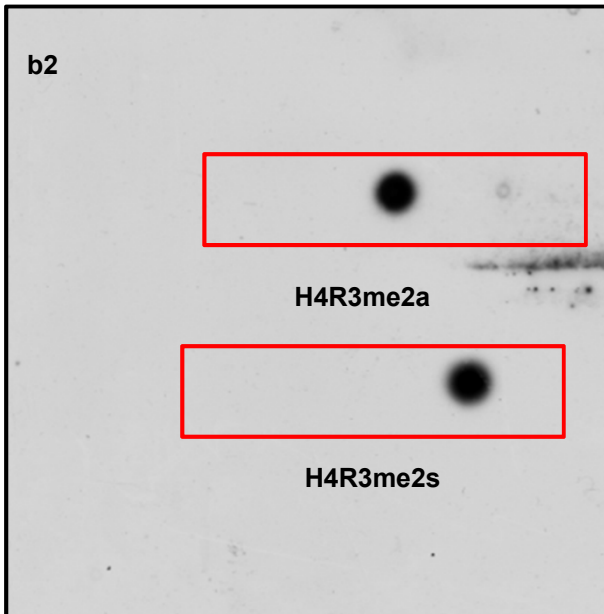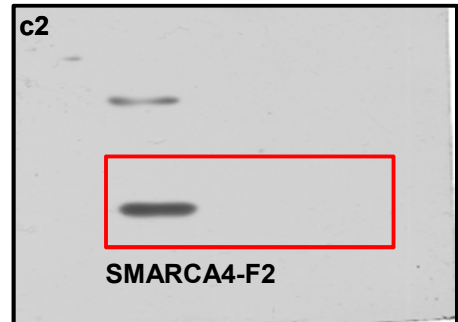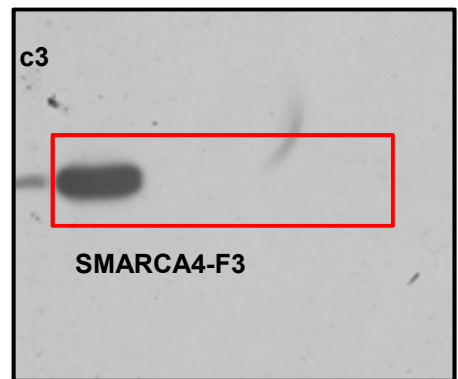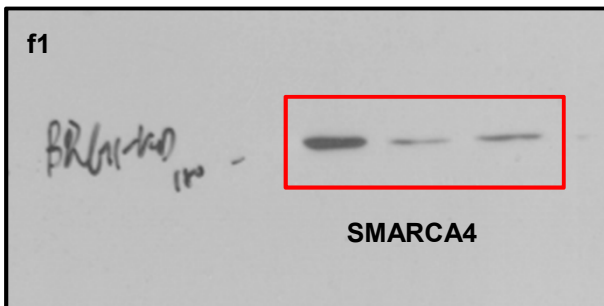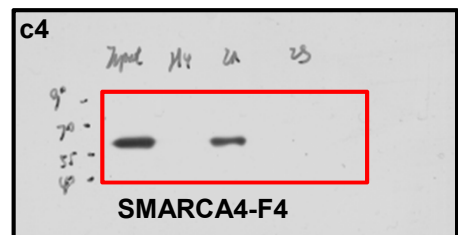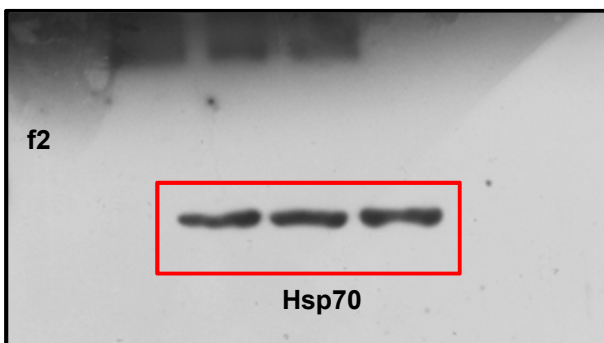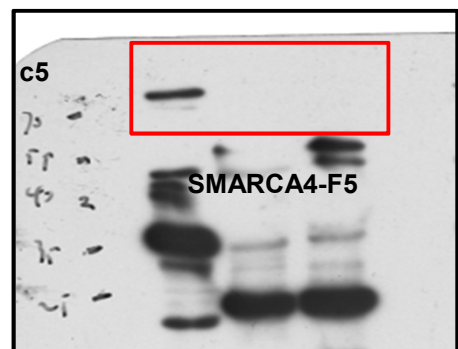

**Fig. S2.** Uncropped blots for Western blots in Fig. 2.

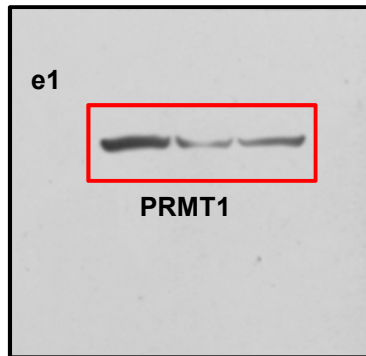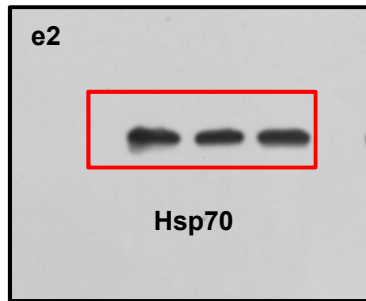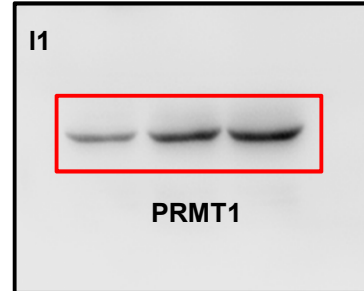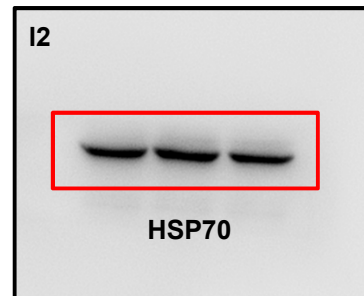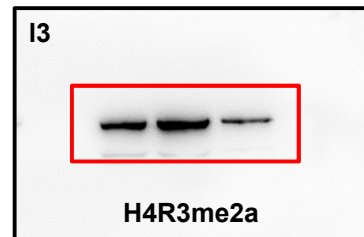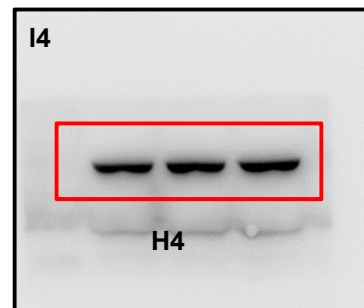

**Fig. S3.** Uncropped blots for Western blots in Fig. 3.

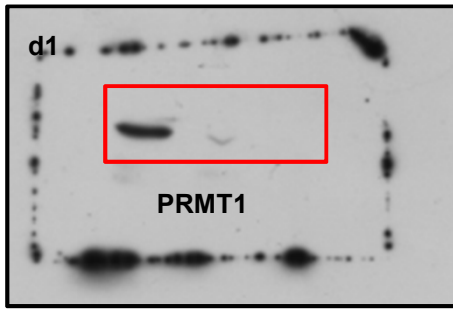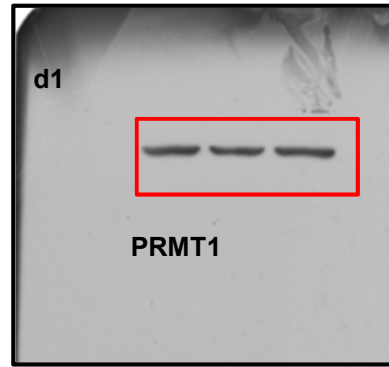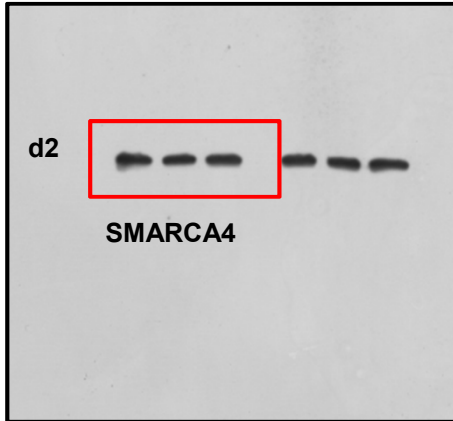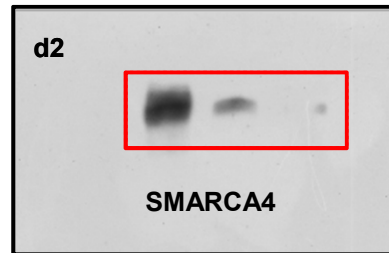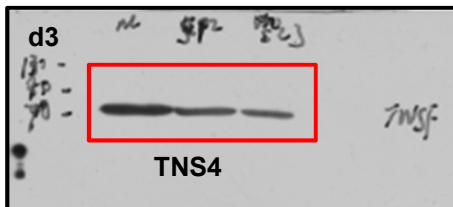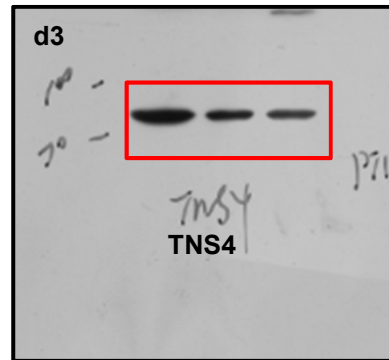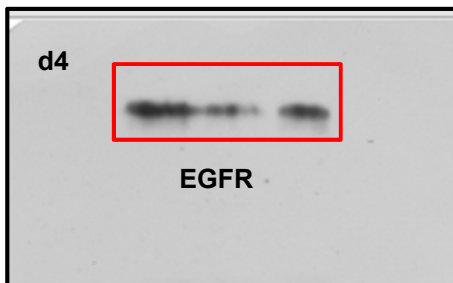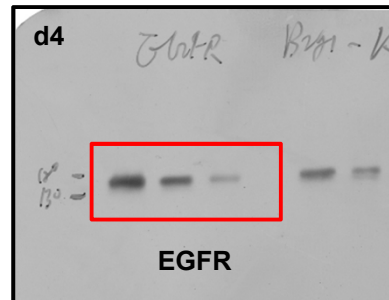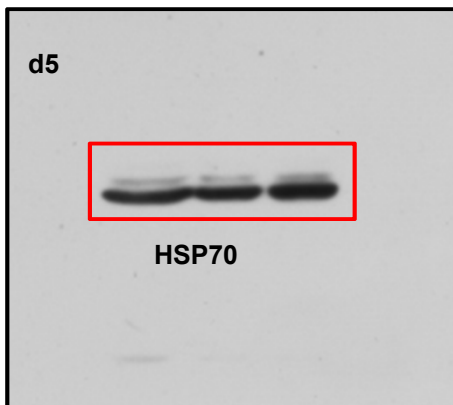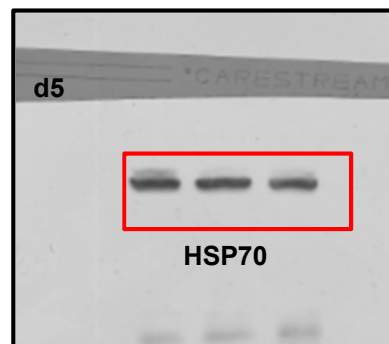

**Fig. S4.** Uncropped blots for Western blots in Fig. 4.

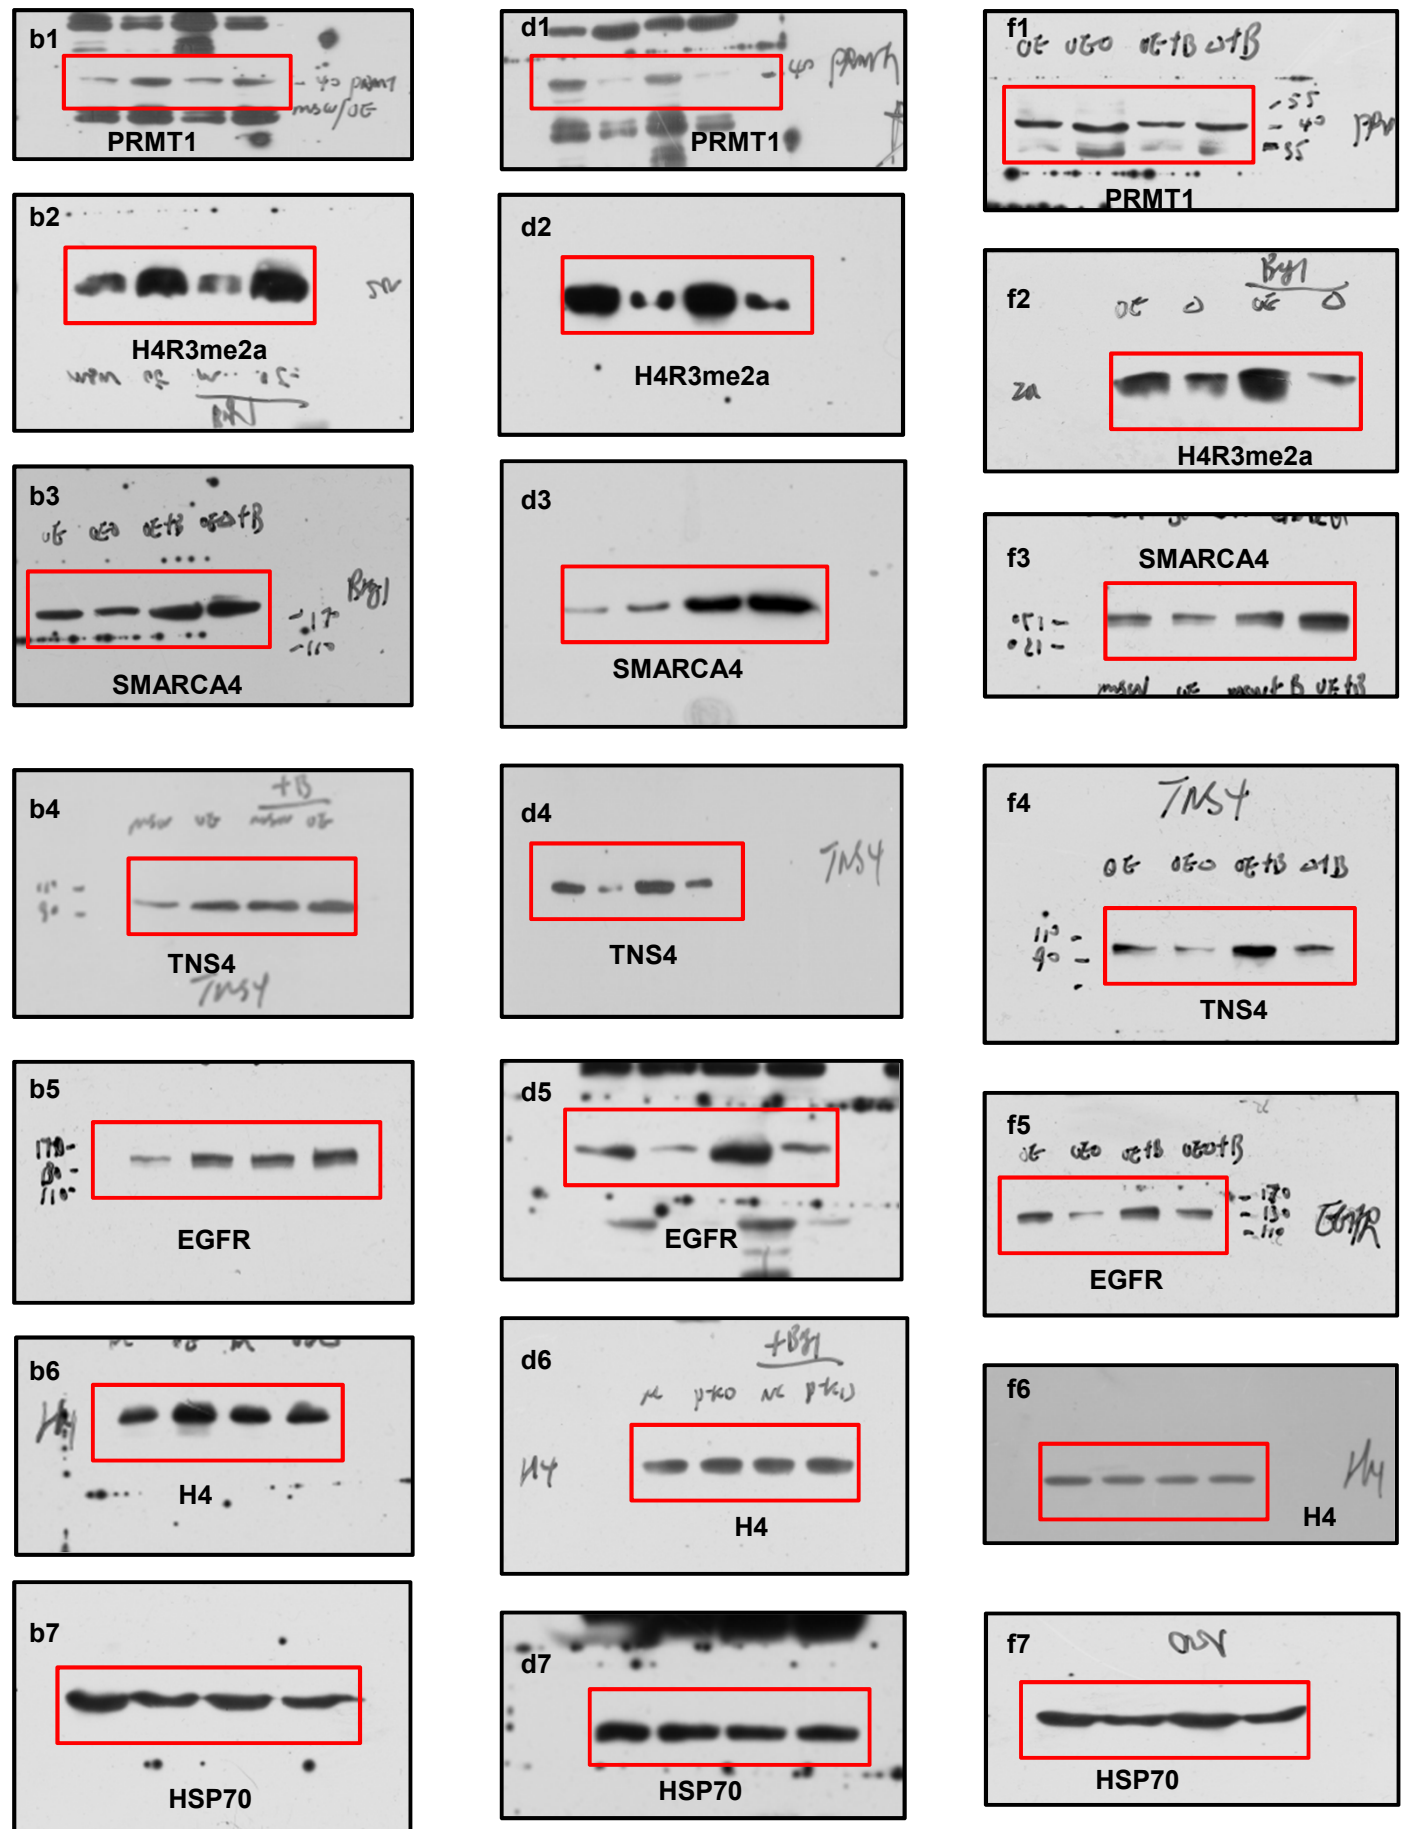

**Fig. S5.** Uncropped blots for Western blots in Fig. 5.

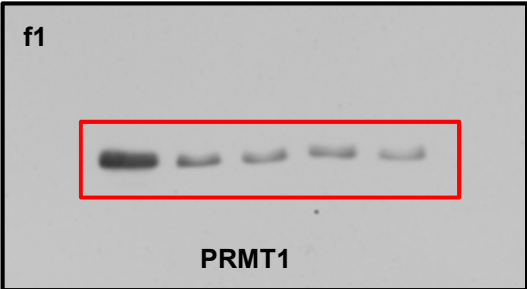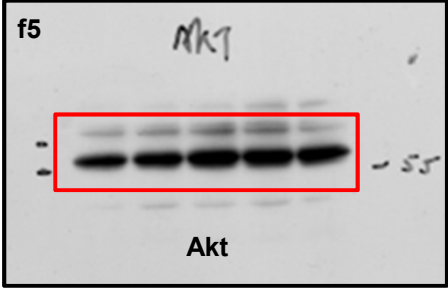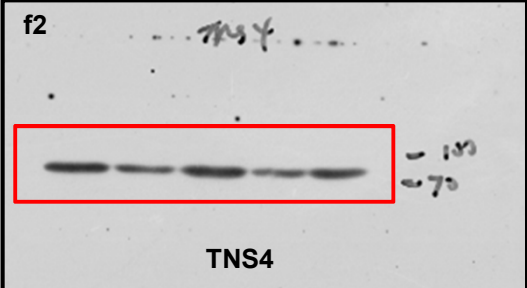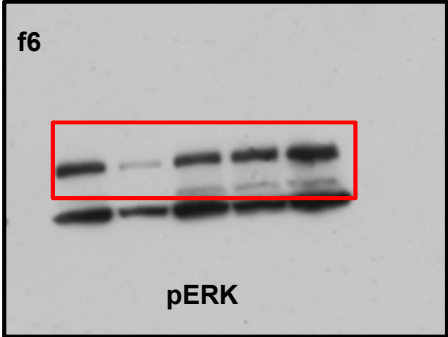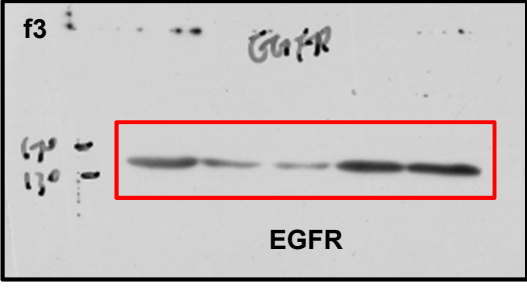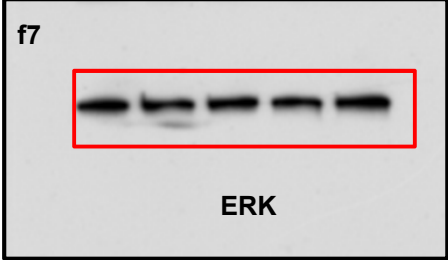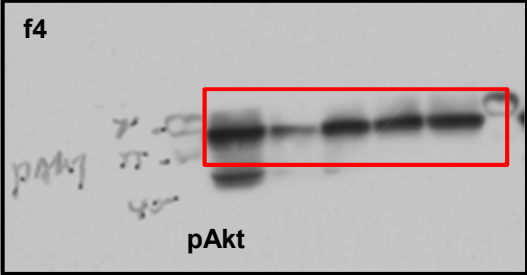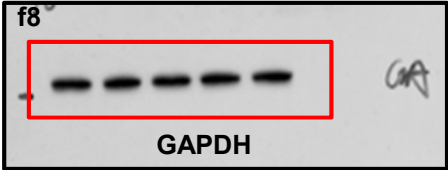

**Fig. S5.** Uncropped blots for Western blots in Fig. 5.

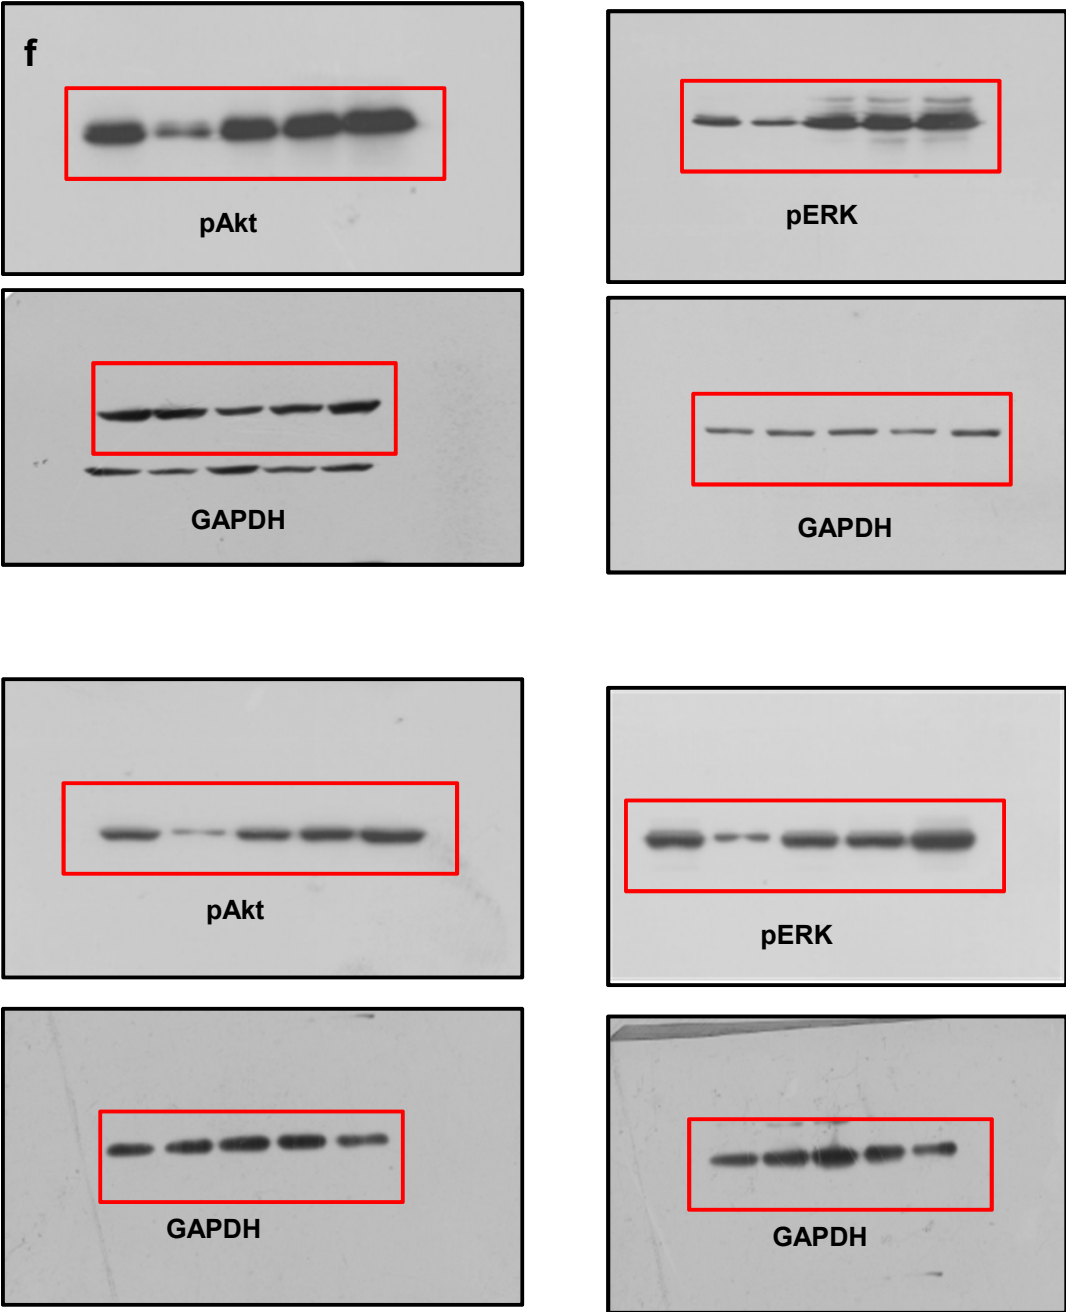

**Fig. S6.** Uncropped blots for Western blots in Fig. 6.

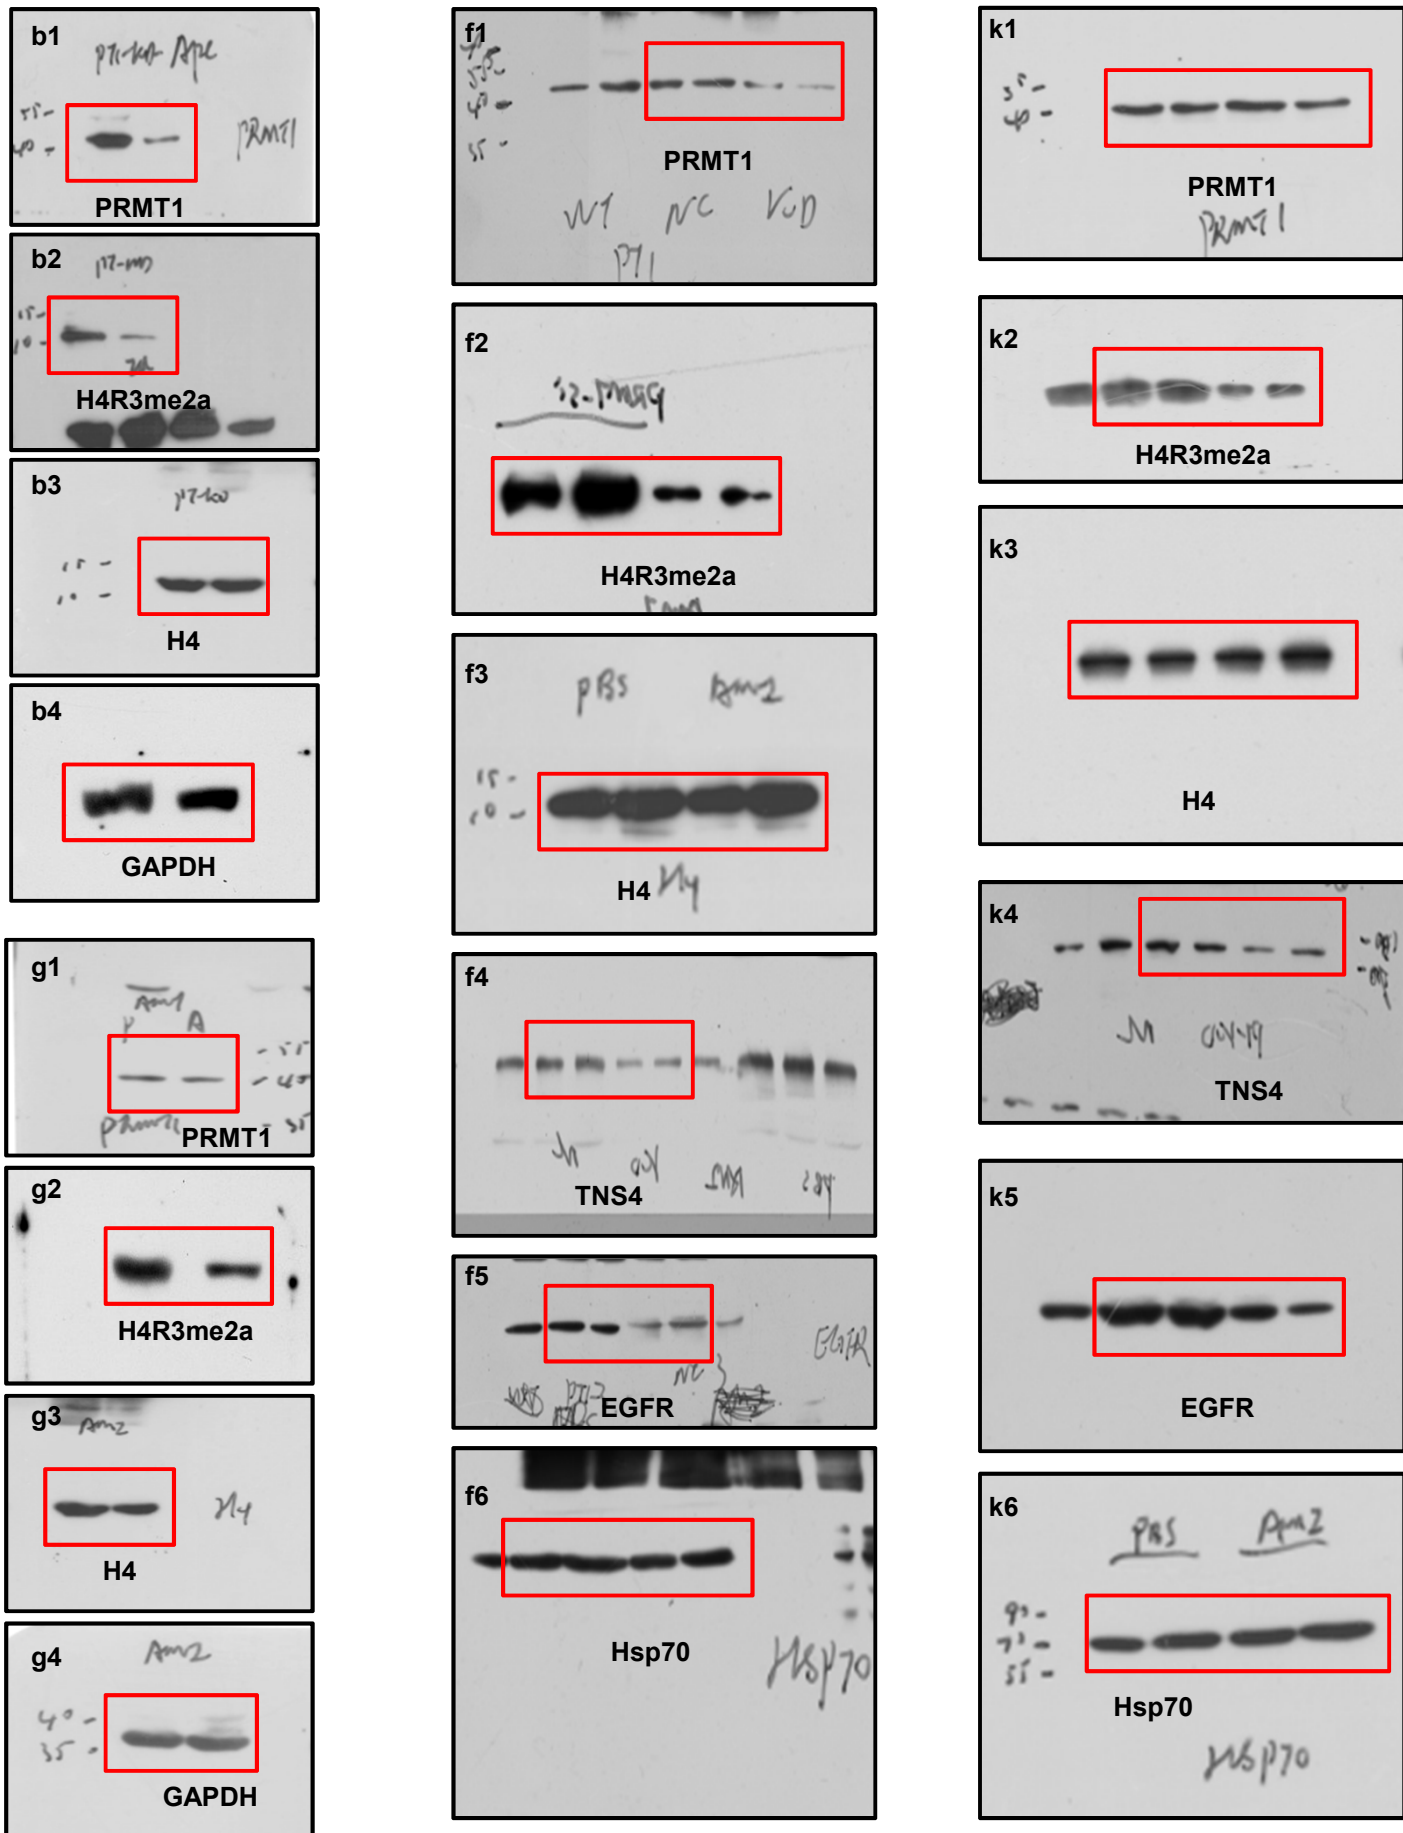



**Fig. S7.** Uncropped blots for Western blots in Additional file 1: Fig. S1.

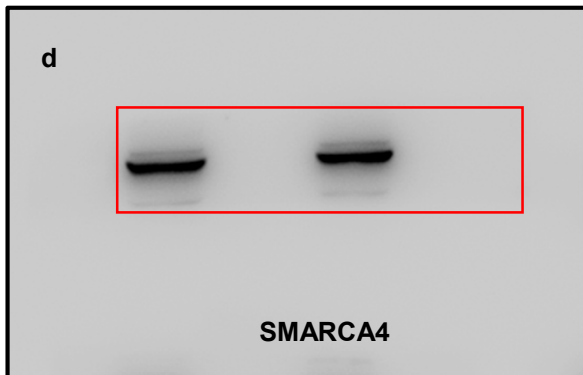



**Fig. S8.** Uncropped blots for Western blots in Additional file 1: Fig. S3.

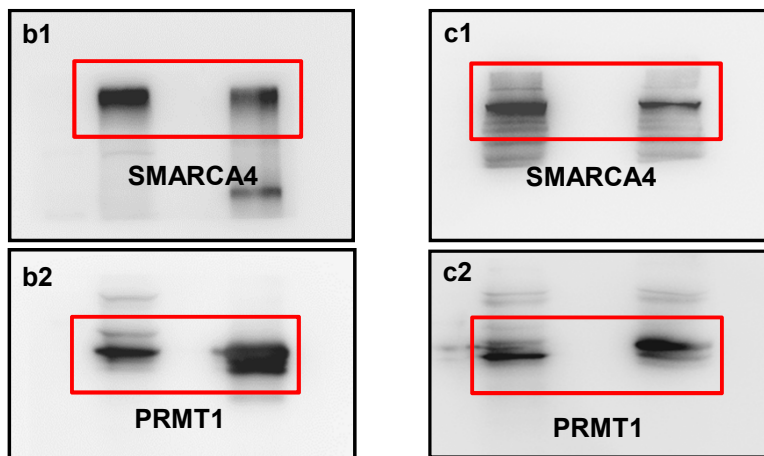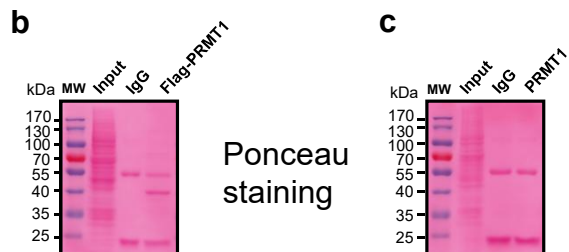

**Fig. S9.** Uncropped blots for Western blots in Additional file 1: Fig. S6.

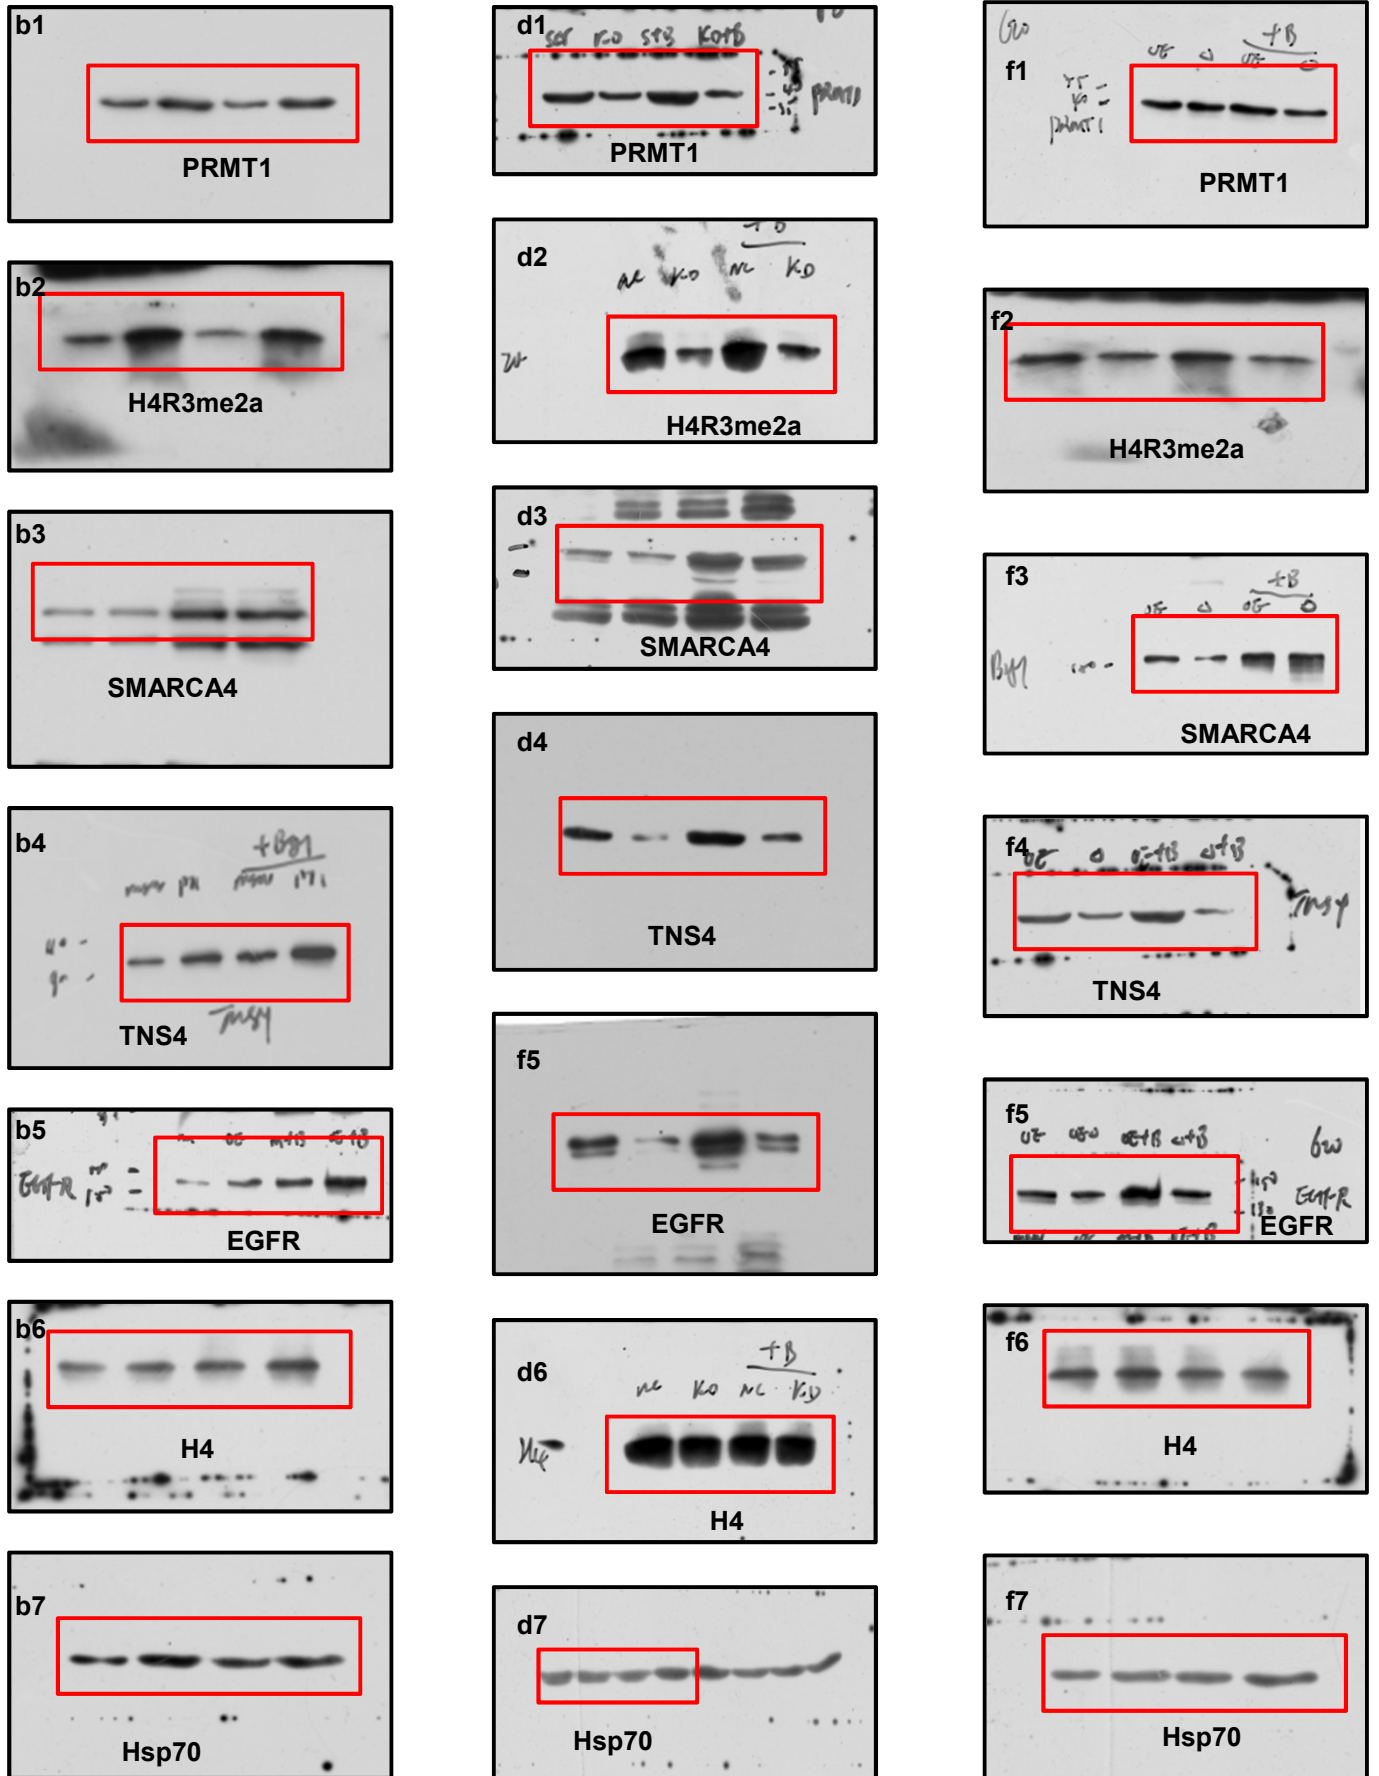

**Fig. S9.** Uncropped blots for Western blots in Additional file 1: Fig. S6.

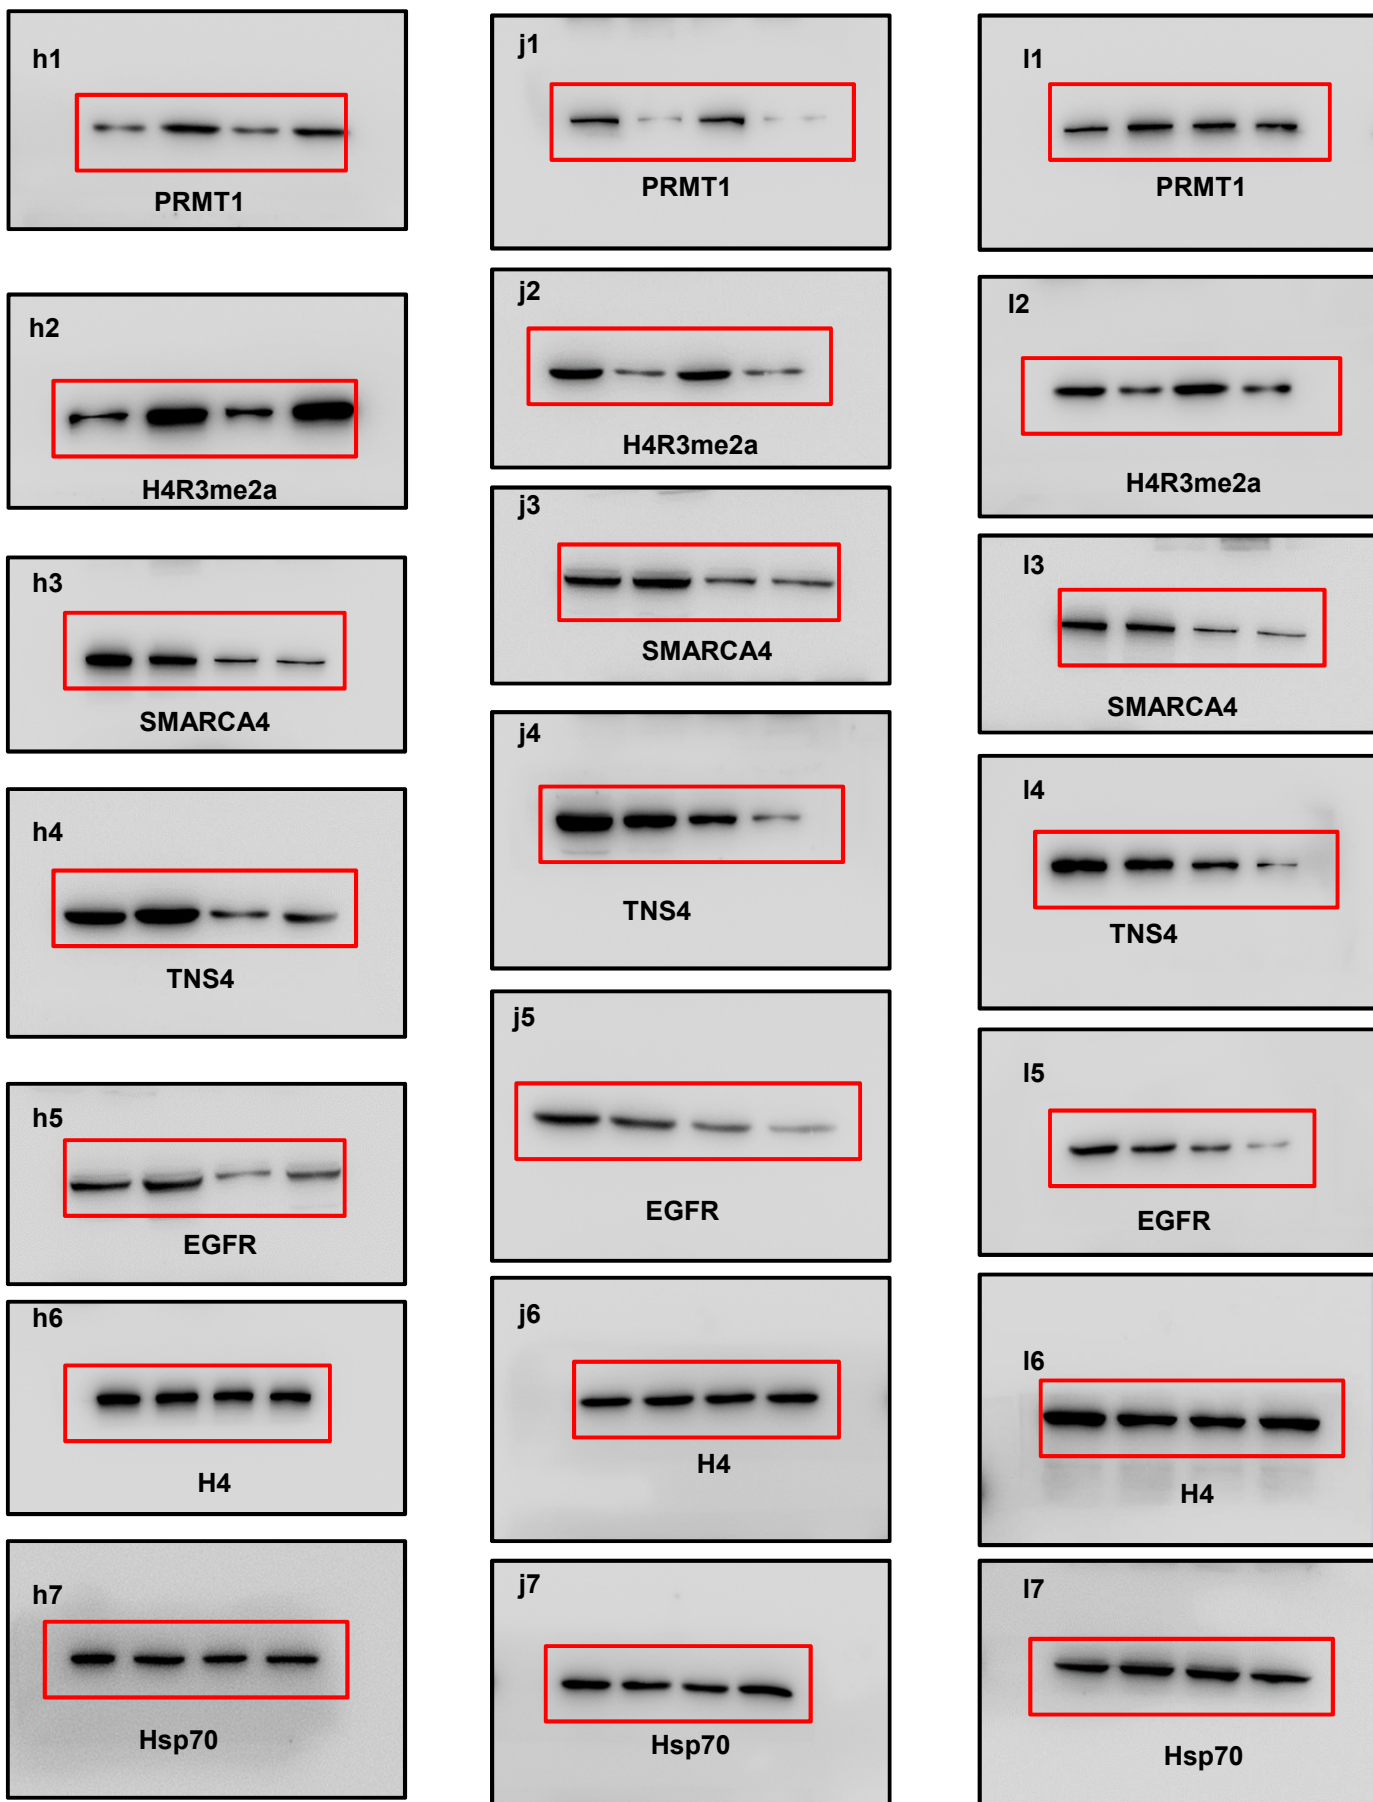

**Fig. S10.** Uncropped blots for Western blots in Additional file 1: Fig. S8.

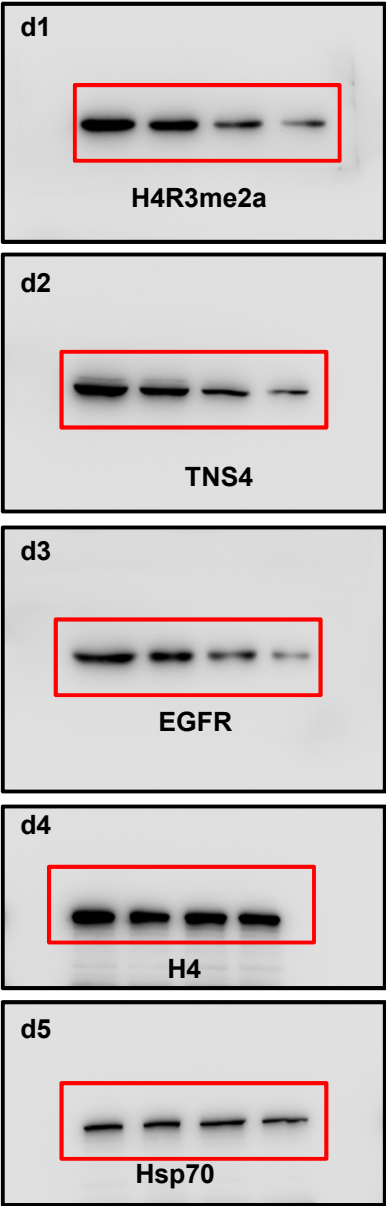

Supplement: 13073_2021_871_MOESM3_ESM.pdf [file 13073_2021_871_MOESM3_ESM.pdf]
